# Supplementary material
Source: Springer Nature journal article supplement (https://www.springermedizin.de/resource/supplementary/12968_2011_2579_MOESM7_ESM.pdf/9582312)

**Inflow**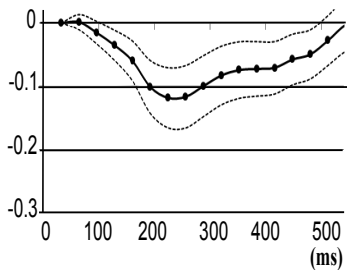**Outflow**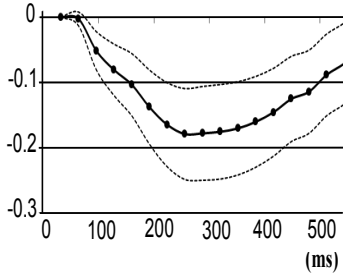**Mid**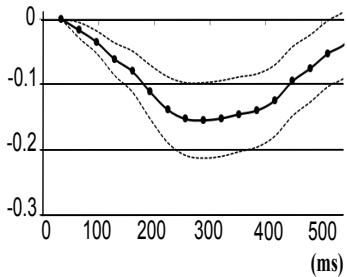**Apex**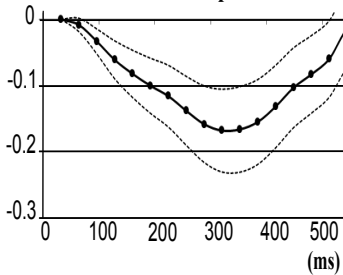

Supplement: MOESM7 [file 9582312]
